# Supplementary material for: Keratin-derived S/N co-doped graphene-like nanobubble and nanosheet hybrids for highly efficient oxygen reduction
Source: Royal Society of Chemistry journal article supplement (doi:10.1039/c6ta06212a), 2016-01-01
Supplement: c6ta06212a1.pdf [file c6ta06212a1.pdf]

## Supporting Information

### **Keratin-derived S/N co-doped graphene-like nanobubble and nanosheet hybrids for highly efficient oxygen reduction**

Jian Zhang,<sup>a,b</sup> Huang Zhou,<sup>a</sup> Xiaobo Liu,<sup>a</sup> Jie Zhang,<sup>a</sup> Tao Peng,<sup>c</sup> Jinlong Yang,<sup>d</sup>

Yunhui Huang,<sup>\*b</sup> Shichun Mu<sup>\*a</sup>

a. State Key Laboratory of Advanced Technology for Materials Synthesis and  
Processing, Wuhan University of Technology, Wuhan 430070, PR China

b. State Key Laboratory of Material Processing and Die & Mould Technology, School  
of Materials Science and Engineering, Huazhong University of Science and  
Technology, Wuhan 430074, PR China

c. Department of Civil and Environmental Engineering, University of Windsor,  
Windsor N9B 3P4, Canada

d. Peking University, Shenzhen Graduate School University, Shenzhen 518055, PR  
China

\*Corresponding Author: Email: [huangyh@hust.edu.cn](mailto:huangyh@hust.edu.cn) (YH Huang);

[msc@whut.edu.cn](mailto:msc@whut.edu.cn) (SC Mu)

## Contents

**Fig. S1** TEM images of hybridized graphene-like nanobubbles and nanosheets (GLBS).

**Fig. S2** XRD patterns of GLBS, GLBS-1000 and graphite.

**Fig. S3** The pore size distribution of GLBS and GLBS-1000.

**Fig. S4** TEM image of the flake-shaped carbon.

**Fig. S5** The optical photo of the residual carbon.

**Fig. S6** SEM, TEM, N<sub>2</sub> adsorption-desorption isotherms and pore size distribution of keratin derived carbon (KDC) without KOH activation.

**Fig. S7** CV and LSV curve for GLBS catalyst.

**Fig. S8** LSV curves for GLBS-800, GLBS-900, GLBS-1000 and GLBS-1000 catalyst.

The Koutecky-Levich (K-L) equation

**Fig. S9** The K-L plots at the range potential from 0.2 to 0.6 V.

**Fig. S10** The stability of Pt/C catalyst before and after ADT.

**Fig. S11** LSV curves of GLBS-1000 and Pt/C catalysts in acidic media (a); *i*-*t* chronoamperometric response of GLBS-1000 and Pt/C catalysts in acidic media under a constant potential at 0.55 V at a rotation rate of 1600 rpm; inset: the ratio of  $J/J_0$  (b).

**Table S1** The content of C, N, O and S in GLBS and GLBS-1000.

**Table S2** Comparison of the Tafel slopes between GLBS-1000 and other reported carbon based catalysts under 0.1 M KOH conditions in literature.

## Reference

**Fig. S1**

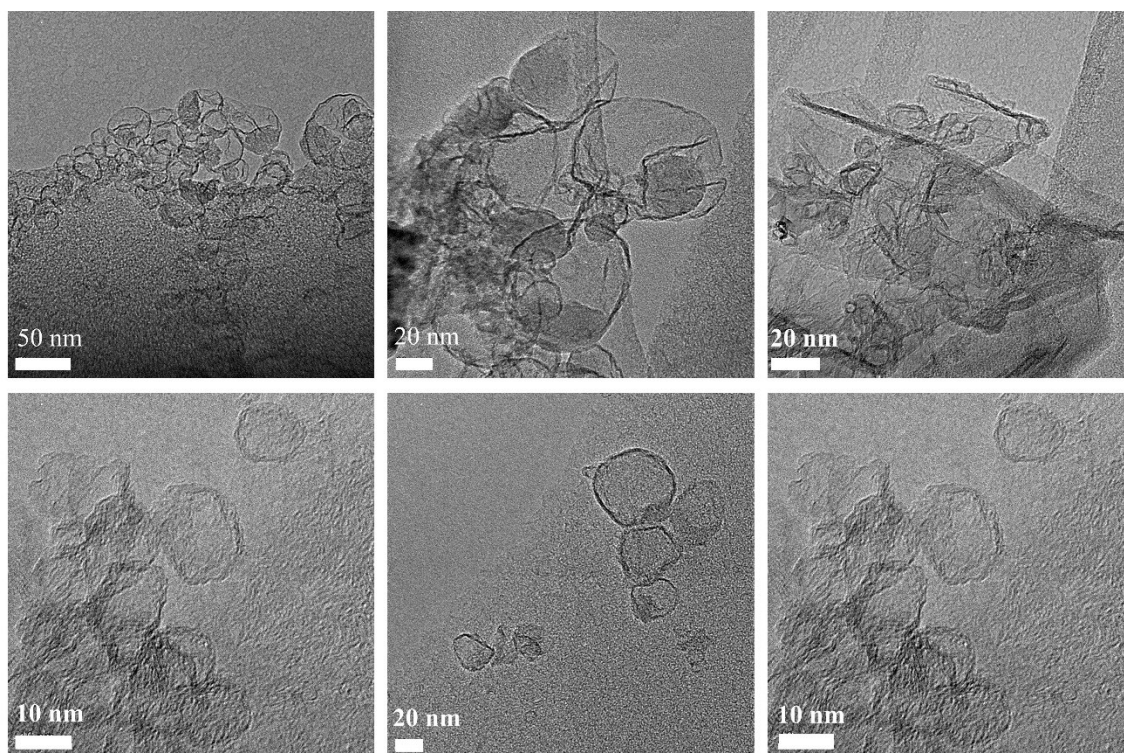

**Fig. S1** TEM images of hybridized graphene-like nanobubbles and nanosheets (GLBS).

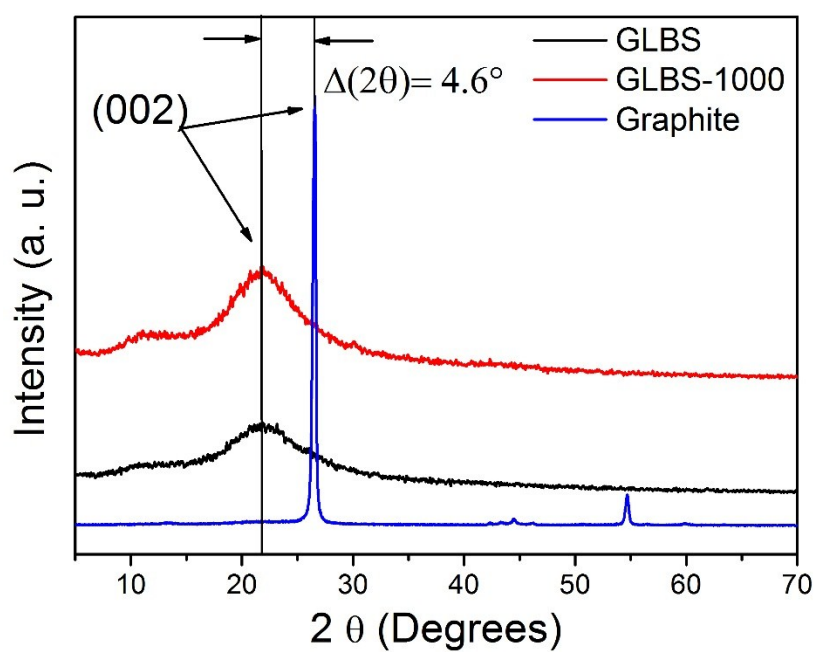

**Fig. S2** XRD patterns of GLBS, GLBS-1000 and graphite.

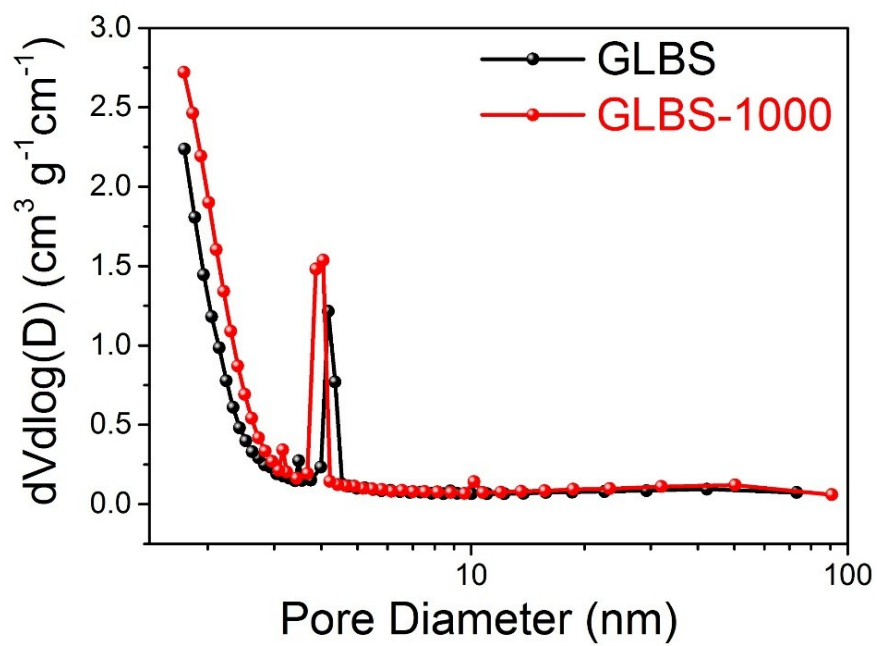

**Fig. S3** The pore size distribution of GLBS and GLBS-1000.

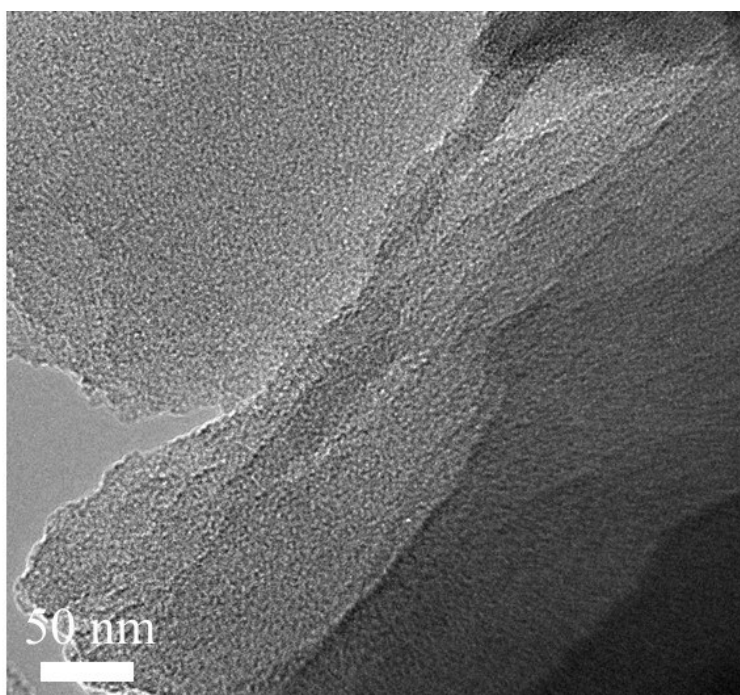

**Fig. S4** TEM image of the flake-shaped carbon.

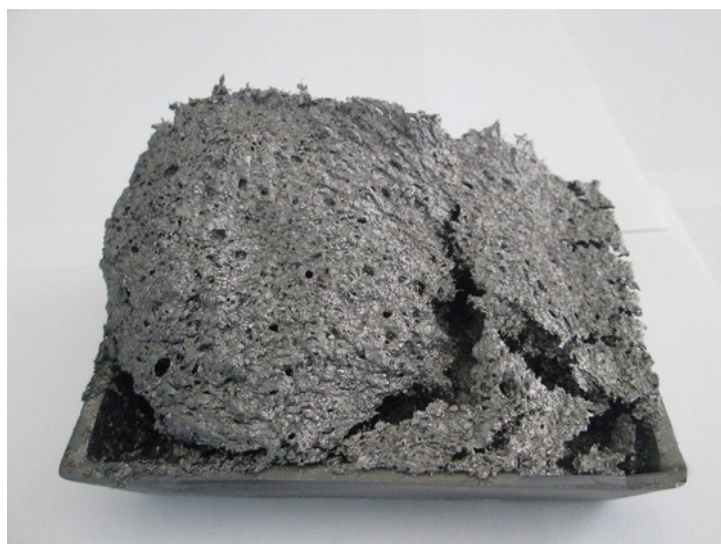

**Fig. S5** The optical photo of the residual carbon.

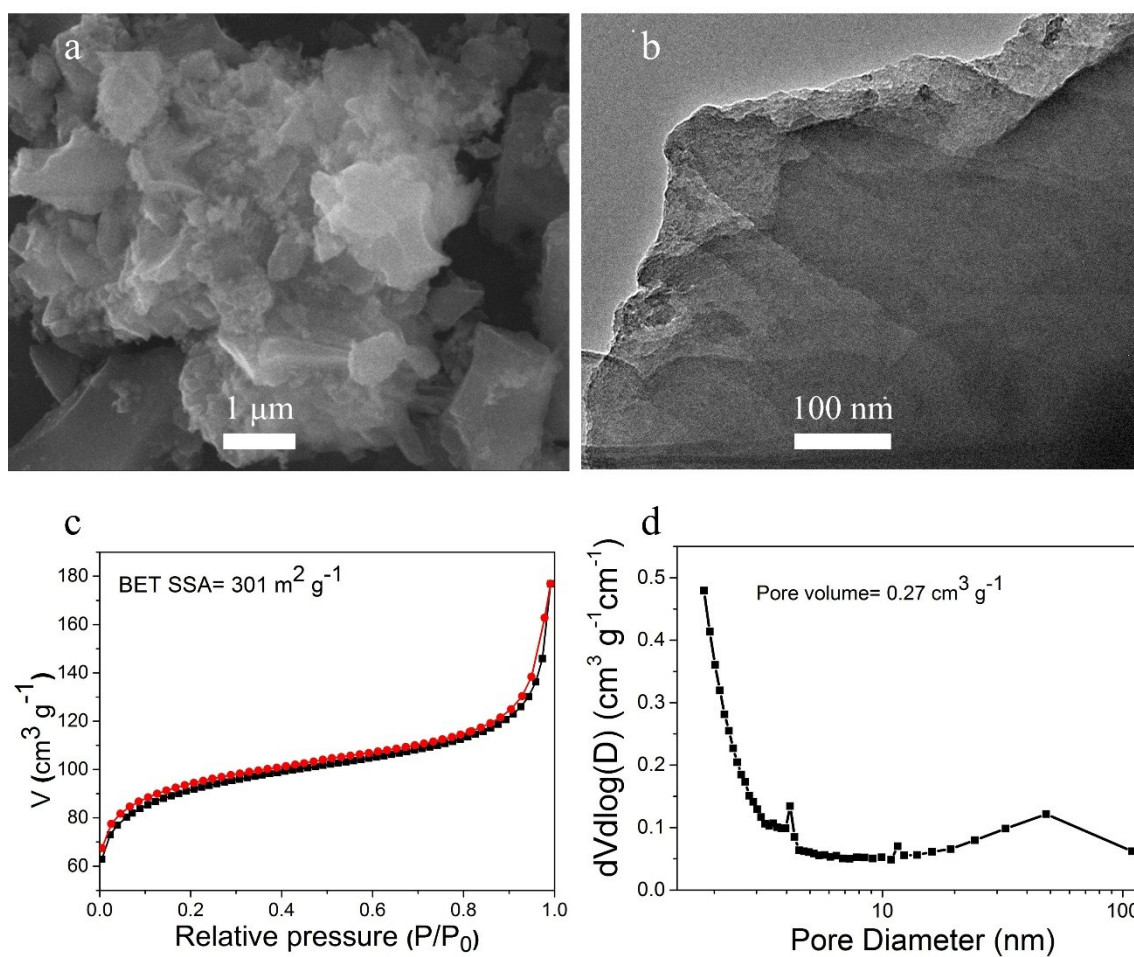

**Fig. S6** SEM, TEM, N<sub>2</sub> adsorption-desorption isotherms and pore size distribution of keratin derived carbon (KDC) without KOH activation.

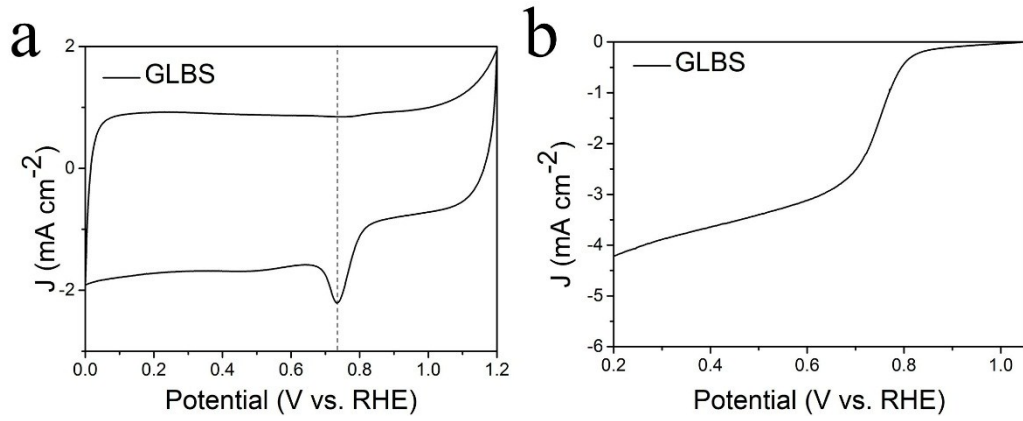

**Fig. S7** CV and LSV curve for GLBS catalyst.

The Koutecky-Levich (K-L) equation as given below:

$$\frac{1}{J} = \frac{1}{J_L} + \frac{1}{J_K} = \frac{1}{B\omega^{1/2}} + \frac{1}{J_K} \quad (1)$$

$$B = 0.62nFC_0(D_0)^{2/3}\nu^{-1/6} \quad (2)$$

where  $J$  denotes the measured current density,  $J_K$  is the kinetic current density,  $J_L$  is the diffusion-limited current density,  $\omega$  is the electrode rotation rate,  $F$  is the Faraday constant ( $96485 \text{ C mol}^{-1}$ ),  $C_0$  is the bulk concentration of  $\text{O}_2$  ( $1.2 \times 10^{-3} \text{ mol L}^{-1}$ ),  $D_0$  is the diffusion coefficient of  $\text{O}_2$  ( $1.9 \times 10^{-5} \text{ cm}^2 \text{ s}^{-1}$ ) and  $\nu$  is the kinetic viscosity of the electrolyte ( $1.0 \times 10^{-2} \text{ cm}^2 \text{ s}^{-1}$ ).

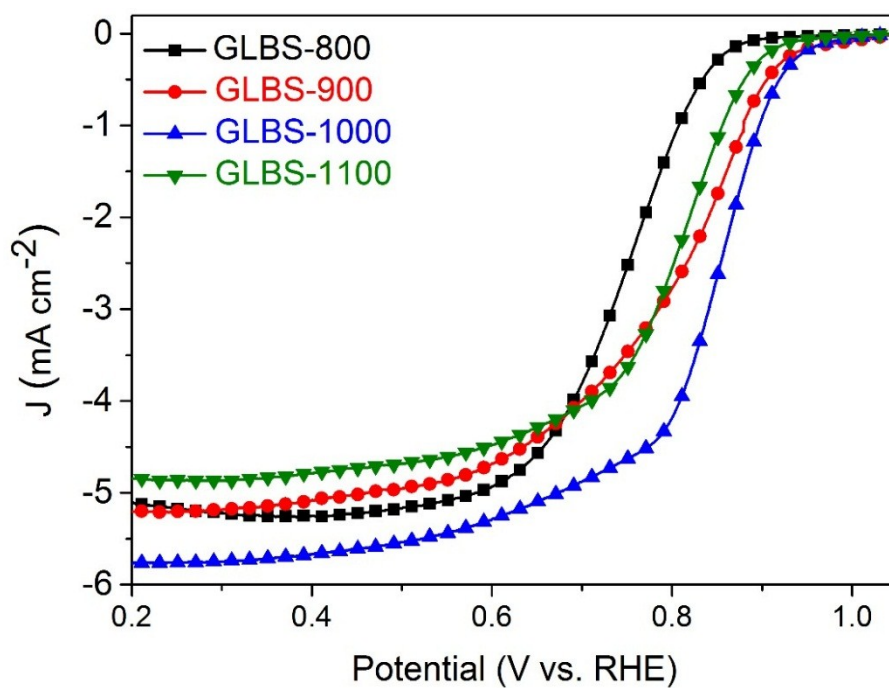

**Fig. S8** LSV curves for GLBS-800, GLBS-900, GLBS-1000 and GLBS-1000 catalyst.

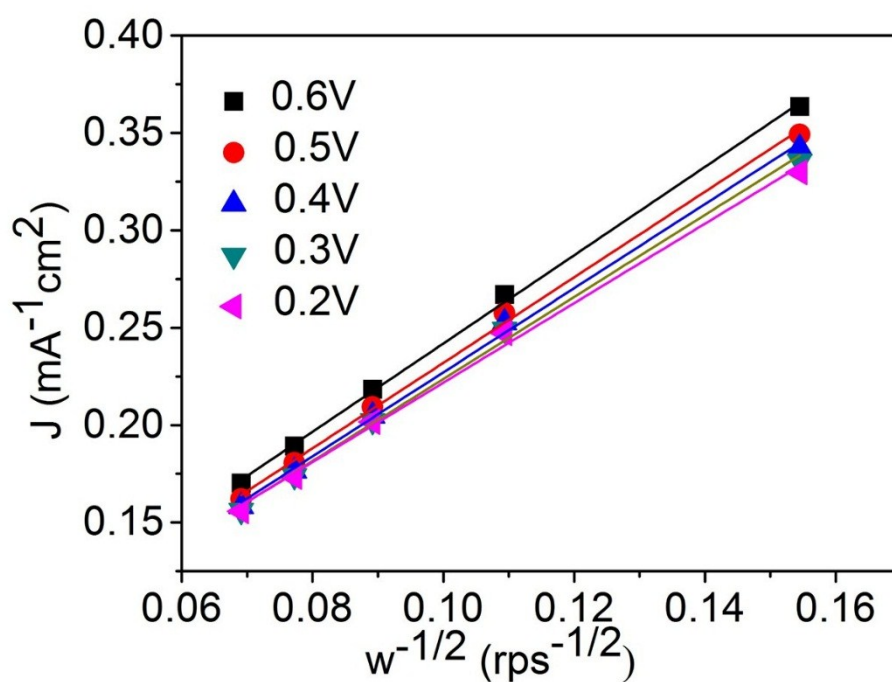

**Fig. S9** The K-L plots at the range potential from 0.2 to 0.6 V.

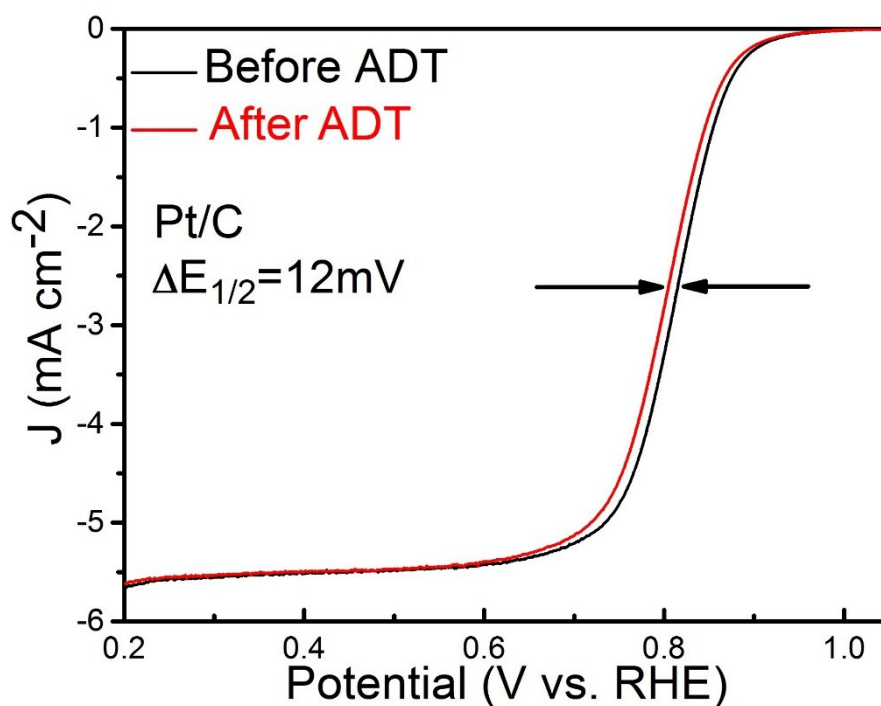

**Fig. S10** The stability of Pt/C catalyst before and after accelerated durability test (ADT) of 3,000 cycles from 0.4 to 1.0 V.

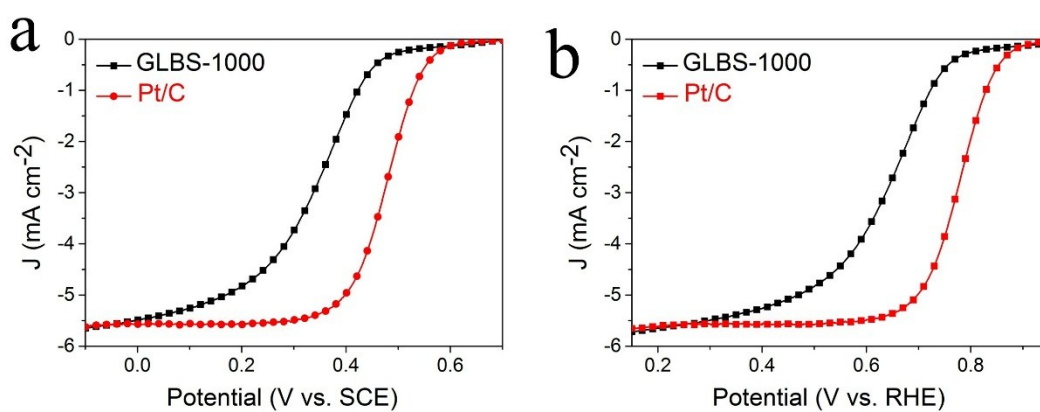

**Fig. S11** LSV curves of GLBS-1000 and Pt/C catalysts in acidic media (a); i-t chronoamperometric response of GLBS-1000 and Pt/C catalysts in acidic media under a constant potential at 0.3 V at a rotation rate of 1600 rpm; inset: the ratio of  $J/J_0$  (b).

**Table S1** The content of C, N, O, S and the possible metal in GLBS and GLBS-1000.

| Sample    | Content (%) |     |      |     |
|-----------|-------------|-----|------|-----|
|           | C           | N   | O    | S   |
| GLBS      | 75.4        | 4.9 | 19.2 | 0.5 |
| GLBS-1000 | 95.9        | 1.5 | 2.5  | 0.1 |

**Table S2** Comparison of the Tafel slopes between GLBS-1000 and other reported carbon based catalysts under 0.1 M KOH conditions in literature.

| Reference | Tafel slope (mV per decade) | Catalyst name            |
|-----------|-----------------------------|--------------------------|
| This work | 68                          | GLBS-1000                |
| 1         | 72                          | N-PANn-1000              |
| 2         | 69                          | (GO 8 wt%) Cu.MOF        |
| 3         | 69                          | Fe/N-gCB                 |
| 4         | 75                          | Co SAs/N-C(900)          |
| 5         | 103                         | WHC-700                  |
| 6         | 85                          | BP350@C-1000             |
| 7         | 67                          | Fe <sub>3</sub> C/NG-800 |
| 8         | 105                         | Fe/C-SOYB                |
| 9         | 84                          | BP1000                   |

## Reference

1. X. She, D. Yang, D. Jing, F. Yuan, W. Yang, L. Guo and Y. Che, *Nanoscale*, 2014, **6**, 11057-11061.
2. M. Jahan, Z. Liu and K. P. Loh, *Adv. Funct. Mater.*, 2013 **23**, 5363-5372.
3. R. Zhou and S. Z. Qiao, *Chem. Commun.*, 2015, **51**, 7516-7519.
4. P. Yin, T. Yao, Y. Wu, L. Zheng, Y. Lin, W. Liu, H. Ju, J. Zhu, X. Hong, Z. Deng, G. Zhou, S. Wei and Y. Li, *Angewandte Chemie*, 2016, DOI: 10.1002/anie.201604802.
5. X. Liu, Y. Zhou, W. Zhou, L. Li, S. Huang and S. Chen, *Nanoscale*, 2015, **7**, 6136-6142.
6. C. Guo, W. Liao, Z. Li and C. Chen, *Carbon*, 2015, **85**, 279-288.
7. M. Xiao, J. Zhu, L. Feng, C. Liu and W. Xing, *Adv. Mater.*, 2015, **27**, 2521-2527.
8. C.-Z. Guo, W.-L. Liao and C.-G. Chen, *J. Power Sources*, 2014, **269**, 841-847.
9. C.-Z. Guo, C.-G. Chen and Z.-L. Luo, *J. Power Sources*, 2014, **245**, 841-845.
